# Supplementary material for: Underwater Attachment of the Water-Lily Leaf Beetle Galerucella nymphaeae (Coleoptera, Chrysomelidae)
Source: MDPI journal article supplement (doi:10.3390/biomimetics7010026), 2022-02-14
Supplement: s1 [file s1]

# Under water attachment of the water-lily leaf beetle *Galerucella nymphaeae* (Coleoptera, Chrysomelidae)

Constanze Grohmann, Anna-Lisa Cohrs and Stanislav N. Gorb

## Supplementary materials

**Table S1: Period of time until *G. nymphaeae* detaches from the horizontal leaf under water or ascends to the top of the inclined leaf under water.**

| Period of time until detachment (min:sec) |                        | Period of time until ascend (min:sec) |                        |
|-------------------------------------------|------------------------|---------------------------------------|------------------------|
| Running beetles                           | Beetles standing still | Running beetles                       | Beetles standing still |
| 03:34                                     | 01:47                  | 00:00                                 | 00:33                  |
| 11:05                                     | 01:43                  | 00:00                                 | 00:11                  |
| 06:03                                     | 04:06                  | 00:00                                 | 00:20                  |
| 11:27                                     | 01:20                  | 00:00                                 | 00:43                  |
| 00:40                                     | 02:34                  | 00:00                                 | 01:25                  |
| 03:59                                     | 03:21                  | 00:00                                 | 00:35                  |
| 00:20                                     | 01:49                  | 00:00                                 | 00:54                  |
| 03:29                                     | 00:10                  | 00:00                                 | 00:28                  |
| 03:20                                     | 03:08                  | 00:00                                 | 00:38                  |
| 04:21                                     | 03:31                  |                                       |                        |
| 03:00                                     | 00:10                  |                                       |                        |
| 03:56                                     | 01:01                  |                                       |                        |
| 00:40                                     | 00:40                  |                                       |                        |
| 00:05                                     | 00:10                  |                                       |                        |
| 01:49                                     | 03:11                  |                                       |                        |
| 02:04                                     | 05:34                  |                                       |                        |
| 02:57                                     | 05:10                  |                                       |                        |
| 02:40                                     | 01:40                  |                                       |                        |
| 01:15                                     | 02:56                  |                                       |                        |
| 03:41                                     | 02:43                  |                                       |                        |
| 04:14                                     | 02:50                  |                                       |                        |
| 01:00                                     | 01:30                  |                                       |                        |
| 01:20                                     | 01:50                  |                                       |                        |
| 01:30                                     | 01:10                  |                                       |                        |
| 01:25                                     | 01:45                  |                                       |                        |

**Table S2: The subtarsal air bubble on different surfaces.** Area of the tarsal air bubble taken immediately, when *G. nymphaeae* was submerged on hydrophilic (contact angle of water: 54°) and hydrophobic (contact angle of water: 99°) glass slides, time until beetle detachment and difference of the bubble area between the beginning of the experiment and just before the beetle detached.

| Area of tarsal air bubble (mm <sup>2</sup> ) |       | Period of time until detachment (min:sec) |       | Change of air bubble area (%) |      |
|----------------------------------------------|-------|-------------------------------------------|-------|-------------------------------|------|
| 54°                                          | 99°   | 54°                                       | 99°   | 54°                           | 99°  |
| 0.107                                        | 0.134 | 03:16                                     | 03:59 | -43                           | -45  |
| 0.100                                        | 0.077 | 09:48                                     | 07:21 | -10                           | -1   |
| 0.091                                        | 0.103 | 03:10                                     | 02:07 | -28                           | 0    |
| 0.088                                        | 0.102 | 04:21                                     | 00:47 | -2                            | 9    |
| 0.038                                        | 0.119 | 00:53                                     | 01:40 | 0                             | 28   |
| 0.140                                        | 0.014 | 01:54                                     | 03:14 | -36                           | -22  |
| 0.090                                        | 0.146 | 04:47                                     | 01:32 | 3                             | -10  |
| 0.104                                        | 0.104 | 05:40                                     | 01:00 | -1                            | 0    |
| 0.031                                        | 0.089 | 04:00                                     | 01:15 | -2                            | 23   |
| 0.084                                        | 0.176 | 00:24                                     | 03:29 | 13                            | -21  |
| 0.080                                        | 0.138 | 01:54                                     | 06:33 | -3                            | -4   |
| 0.100                                        | 0.154 | 07:51                                     | 05:47 | -3                            | -12  |
| 0.102                                        | 0.109 | 16:04                                     | 02:52 | -3                            | -100 |
| 0.057                                        | 0.101 | 02:29                                     | 04:39 | -7                            | -62  |
| 0.119                                        | 0.015 | 01:48                                     | 00:51 | -9                            | -56  |
| 0.091                                        | 0.014 | 00:31                                     | 04:14 | -6                            | -25  |
| 0.096                                        | 0.081 | 07:02                                     | 04:54 | -1                            | -100 |
| 0.111                                        | 0.117 | 01:36                                     | 02:56 | -27                           |      |
| 0.011                                        | 0.076 | 01:18                                     | 04:26 | -34                           |      |
| 0.085                                        | 0.008 | 03:10                                     | 01:23 |                               |      |
| 0.097                                        | 0.018 | 06:01                                     | 06:43 |                               |      |
| 0.012                                        | 0.016 | 01:23                                     | 01:54 |                               |      |
| 0.074                                        | 0.000 | 04:26                                     | 00:22 |                               |      |
| 0.028                                        | 0.125 | 13:06                                     | 04:10 |                               |      |
| 0.019                                        | 0.092 | 05:57                                     | 10:32 |                               |      |
| 0.000                                        | 0.129 | 00:20                                     | 01:52 |                               |      |
| 0.007                                        | 0.067 | 01:49                                     | 02:05 |                               |      |
| 0.075                                        | 0.128 | 14:19                                     | 02:34 |                               |      |
| 0.089                                        |       | 06:07                                     |       |                               |      |
| 0.064                                        |       | 09:51                                     |       |                               |      |
| 0.065                                        |       | 02:42                                     |       |                               |      |
| 0.111                                        |       | 00:47                                     |       |                               |      |
| 0.026                                        |       | 00:26                                     |       |                               |      |
| 0.088                                        |       | 03:15                                     |       |                               |      |

**Table S3: Traction force of *G. nymphaeae* in air and under water.** Beetles were tested in both situation on surfaces with contact angle of water of 54° and 99°.

| Beetle Nr. | Traction force (mN) in air |       | Traction force (mN) under water |       |
|------------|----------------------------|-------|---------------------------------|-------|
|            | 54°                        | 99°   | 54°                             | 99°   |
| 1          | 3.531                      | 0.533 | 2.944                           | 1.579 |
| 2          | 1.900                      | 0.564 | 4.768                           | 1.513 |
| 3          | 3.749                      | 0.521 | 1.684                           | 1.766 |
| 4          | 1.085                      | 0.285 | 5.335                           | 1.737 |
| 5          | 2.906                      | 1.091 | 0.871                           | 1.242 |
| 6          | 0.736                      | 0.299 | 0.762                           | 1.311 |
| 7          | 3.139                      | 0.880 | 0.282                           | 1.086 |
| 8          | 2.223                      | 0.736 | 0.807                           | 1.041 |
| 9          | 4.256                      | 0.741 | 0.924                           | 2.023 |
| 10         | 1.725                      | 0.590 | 1.333                           | 3.619 |
| 11         | 7.018                      | 1.039 | 0.627                           | 0.394 |
| 12         | 4.285                      | 1.475 | 3.866                           | 2.214 |
| 13         | 4.669                      | 0.523 | 2.252                           | 1.656 |
| 14         | 5.826                      | 1.629 | 1.371                           | 0.981 |
| 15         | 3.787                      | 0.740 | 0.938                           | 1.877 |
| 16         | 5.774                      | 0.966 | 3.577                           | 2.989 |
| 17         | 0.853                      | 1.283 | 2.336                           | 2.484 |
| 18         | 3.807                      | 0.593 | 2.912                           | 1.499 |
| 19         | 1.563                      | 0.342 | 1.178                           | 1.512 |
| 20         | 3.976                      | 4.578 | 0.653                           | 1.269 |
| 21         | 6.266                      | 0.865 | 1.909                           | 0.947 |
| 22         | 3.583                      | 1.021 | 0.709                           | 1.225 |
| 23         | 4.374                      | 1.119 | 0.979                           | 1.455 |
| 24         | 1.107                      | 0.646 | 0.492                           | 2.060 |
| 25         | 1.592                      | 0.548 | 1.563                           | 2.379 |
| 26         | 2.039                      | 0.369 | 2.502                           | 1.861 |
| 27         | 5.261                      | 1.153 | 2.080                           | 2.231 |
| 28         | 3.660                      | 1.048 | 0.668                           | 2.208 |
| 29         | 1.435                      | 1.021 | 0.992                           | 3.097 |
| 30         | 6.296                      | 1.638 | 2.088                           | 2.666 |
| 31         | 6.927                      | 0.708 |                                 |       |
| 32         | 6.654                      | 2.835 |                                 |       |
| 33         | 5.645                      | 0.767 |                                 |       |

**Table S4: Buoyancy forces of *G. nymphaeae* and *G. viridula*.**

| Forces when the water surface tension film was deformed but the beetles still had contact to the air (mN) |                    | Buoyancy forces when the beetles were surrounded by water (mN) |                    |
|-----------------------------------------------------------------------------------------------------------|--------------------|----------------------------------------------------------------|--------------------|
| <i>G. nymphaeae</i>                                                                                       | <i>G. viridula</i> | <i>G. nymphaeae</i>                                            | <i>G. viridula</i> |
| 0.8418                                                                                                    | 0.5956             | 0.0705                                                         | 0.0274             |
| 0.7189                                                                                                    | 0.5590             | 0.0808                                                         | 0.0437             |
| 1.0546                                                                                                    | 0.4539             | 0.0938                                                         | 0.0229             |
| 0.8991                                                                                                    | 0.3916             | 0.1053                                                         | 0.0566             |
| 0.8721                                                                                                    | 0.4955             | 0.0938                                                         | 0.0342             |
| 0.8511                                                                                                    | 0.6525             | 0.0896                                                         | 0.0436             |
| 0.7166                                                                                                    | 0.5285             | 0.0889                                                         | 0.0362             |
| 0.6695                                                                                                    | 0.4406             | 0.0775                                                         | 0.0203             |
| 0.7652                                                                                                    | 0.5982             | 0.0700                                                         | 0.0313             |
| 0.6411                                                                                                    | 0.4962             | 0.0865                                                         | 0.0309             |
| 0.8743                                                                                                    | 0.4905             | 0.0687                                                         | 0.0304             |
| 0.5914                                                                                                    | 0.6341             | 0.0484                                                         | 0.0250             |
| 0.8266                                                                                                    | 0.5572             | 0.0576                                                         | 0.0158             |
| 0.8117                                                                                                    | 0.4835             | 0.0440                                                         | 0.0417             |
| 0.6703                                                                                                    | 0.3771             | 0.0637                                                         | 0.0119             |
| 0.6338                                                                                                    | 0.3699             | 0.0609                                                         | 0.0367             |
| 0.7315                                                                                                    | 0.4583             | 0.0495                                                         | 0.0179             |
| 0.8068                                                                                                    | 0.3794             | 0.0728                                                         | 0.0277             |
| 0.9204                                                                                                    | 0.2955             | 0.0654                                                         |                    |
| 0.7952                                                                                                    |                    |                                                                |                    |

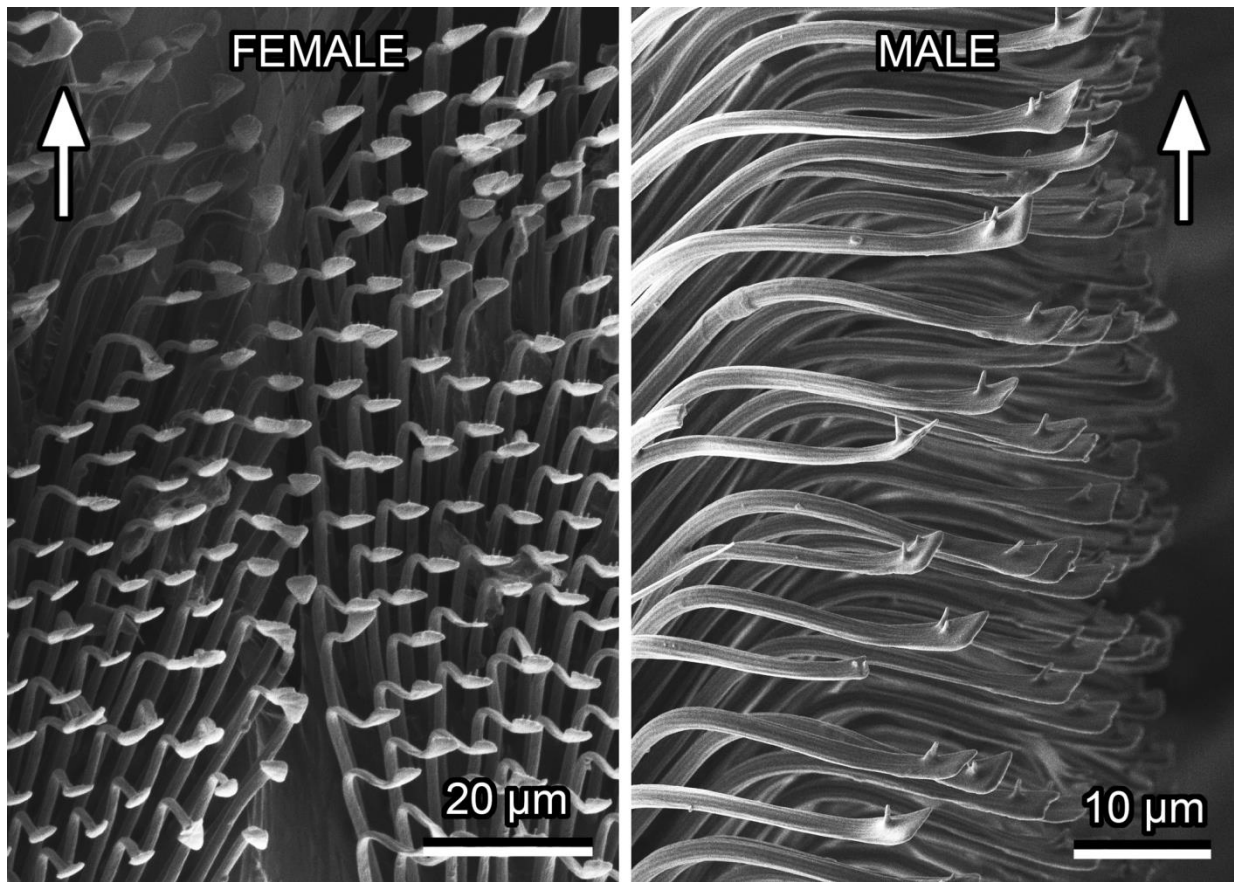

**Figure S1: Female (mid leg) and male (hind leg) setae at high magnification, SEM images.**
